# Supplementary material
Source: PubMed Central journal article supplement (PMC4207963)
Supplement: NIHMS616755-supplement-2.pdf [file NIHMS616755-supplement-2.pdf]

## Supplementary Tables

**Supplementary Table 1: Noncrossover frequency at *Psemb9*.**

| Queried Poly-morphism <sup>b</sup> | ♀ Chromosome             |                                                      |                          |                                         | ♂ Chromosome             |                                         |                          |                                         |
|------------------------------------|--------------------------|------------------------------------------------------|--------------------------|-----------------------------------------|--------------------------|-----------------------------------------|--------------------------|-----------------------------------------|
|                                    | B10.A                    |                                                      | SGR                      |                                         | B10.A                    |                                         | SGR                      |                                         |
|                                    | Non-crossovers (genomes) | Frequency ( $\times 10^{-3}$ ) (95% CI) <sup>a</sup> | Non-crossovers (genomes) | Frequency ( $\times 10^{-3}$ ) (95% CI) | Non-crossovers (genomes) | Frequency ( $\times 10^{-3}$ ) (95% CI) | Non-crossovers (genomes) | Frequency ( $\times 10^{-3}$ ) (95% CI) |
| -87                                | 2<br>(4739)              | 0.42<br>(0.05-1.52)                                  | n.d.                     |                                         | 0<br>(8981)              | <0.0001<br>(0.00-0.33)                  | n.d.                     |                                         |
| BsrFI                              | 65<br>(18994)            | 3.42 <sup>c</sup><br>(2.64-4.36)                     | 3<br>(19286)             | 0.16 <sup>c</sup><br>(0.03-0.45)        | 37<br>(64563)            | 0.57 <sup>c</sup><br>(0.40-0.79)        | 2<br>(58681)             | 0.034 <sup>c</sup><br>(0.004-0.012)     |
| 38                                 | 118<br>(17736)           | 6.65<br>(5.51-7.97)                                  | 2<br>(8805)              | 0.23<br>(0.03-0.82)                     | 103<br>(64563)           | 1.60<br>(1.30-1.93)                     | 1<br>(58681)             | 0.017<br>(0.0004-0.095)                 |
| ▶70                                | 119<br>(16478)           | 7.22<br>(5.98-8.64)                                  | 0<br>(1258)              | <0.0008<br>(<2.38)                      | 111<br>(70405)           | 1.58<br>(1.30-1.90)                     | 0<br>(58681)             | <0.00002<br>(<0.051)                    |
| ▶87                                | 26<br>(7255)             | 3.58<br>(2.34-5.25)                                  | n.d.                     |                                         | 23<br>(15736)            | 1.46<br>(0.93-2.019)                    | n.d.                     |                                         |
| StyI                               | 0<br>(4739)              | <0.0002<br>(<0.78)                                   | n.d.                     |                                         | 0<br>(21577)             | <0.00005<br>(0.00-0.13)                 | n.d.                     |                                         |
| SphI                               | 0<br>(4739)              | <0.0002<br>(<0.78)                                   | n.d.                     |                                         | 0<br>(25082)             | 0.08<br>(0.01-0.29)                     | n.d.                     |                                         |

<sup>a</sup>Confidence interval (CI) calculations here and in the text are from <http://vassarstats.net/> using the Wilson procedure with continuity correction.

<sup>b</sup>Polymorphisms correspond in order to the asterisks in Fig. 1h and Supplementary Figure 1.

<sup>c</sup>Note the 10 to 30-fold higher conversion frequency on the B10.A chromosome compared to the SGR chromosome. Red arrowhead indicates polymorphisms overlapping the position of the PRDM9<sup>wm7</sup> binding site.

**Supplementary Table 2: Primer and oligonucleotide information.**

**a. *Psmb9* hotspot primer sequences.**

| <i>Psmb9</i> primers | Sequence                         | Strain specificity    | Marker       |
|----------------------|----------------------------------|-----------------------|--------------|
| 881U21               | CTGTGCTGGGTAGTTTTGGGC            | B10, R209, B10.A, SGR |              |
| 10225L21             | GGAAACTGGAAGTGGAGTCTG            | B10, R209, B10.A, SGR |              |
| 7716U21              | CCTGATTTTCCTTCGGTGACTA           | B10, R209             |              |
| 3457L19              | GCCCCTGGATGGGTTGTAA              | B10, R209             |              |
| 1297U20A             | ACAGTCTCTCCTCTGCTTTC             | B10.A                 |              |
| 1296U21S             | GACAGTCTCTCCTCTGCTTTA            | SGR                   |              |
| 1308U19              | TCTGCTTTTCCTGGACACGG             | B10                   |              |
| 1308U19b             | TCTGCTTTACTGGACATGT              | R209                  |              |
| 1820L21              | GAGCCACAAGGCAGTAAGAGC            | B10.A, SGR            |              |
| 2020L17A             | GGCAGACCCACCGAAAT                | B10.A                 | -87          |
| 2020L17S             | GGCAGACCCACCGAAAC                | SGR                   | -87          |
| 2092U16b10           | GTTGTGCAAGATGCCT                 | B10, B10.A            | <i>BsrFI</i> |
| 2092U16R209          | GTTGTGCAAGATGCCG                 | R209, SGR             | <i>BsrFI</i> |
| 2128U18A             | ACAGCTTCAAGGGCTCTC               | B10.A                 | 38           |
| 2128U18S             | ACAGCTTCAAGGGCTCTG               | SGR                   | 38           |
| 2160U18b10           | CACGTGGATCCAGGGAAT               | B10.A                 | 70           |
| 2160U17sgr           | ACGTGGATCCAGGGAAC                | SGR                   | 70           |
| 2176U17b10           | AGAACTTTGACCATTAC                | B10.A                 | 87           |
| 2176U17sgr           | AGAACTTTGACCATTAT                | SGR                   | 87           |
| 2296U25S7H           | gaggcaaTTTTTTTTTTTTTTAATCTTGCCTC | B10, SGR              | <i>Styl</i>  |
| 2296U25A7H           | aaggcaaTTTTTTTTTTTTTTAATCTTGCCTT | R209, B10.A           | <i>Styl</i>  |
| SphU17S              | GGCTGGTTTCAGGGCAT                | B10, SGR              | <i>SphI</i>  |
| SphU17A              | GGCTGGTTTCAGGGCAG                | R209, B10.A           | <i>SphI</i>  |
| 3044L14b10           | ACAAACCATTGCCC                   | B10.A                 |              |

|            |                      |             |
|------------|----------------------|-------------|
| 3044L15sgr | TACAAACCATTCCT       | SGR         |
| 3402L20    | AATAAAGGGCTAGCTGTGCA | B10, SGR    |
| 3402L20b   | AATAAAGGGCTGGCTGTGCC | R209, B10.A |
| 4623L20    | ATTTGAGAGTGGGAGGGGAT | B10, SGR    |
| 4623L20b   | ATTTGAGAGTGAGAGGGGAC | R209, B10.A |

**b. *Psmb9* primer combinations.**

| PCR             | Hybrid      | Specificity                              | Annealing Temp | Forward primer       | Reverse primer |
|-----------------|-------------|------------------------------------------|----------------|----------------------|----------------|
| 1 <sup>st</sup> | B10 x R209  | All                                      | 60°C           | 881U21               | 10225L21       |
| 2 <sup>nd</sup> | B10 x R209  | All                                      | 61°C           | 7716U21              | 3457L19        |
| 2 <sup>nd</sup> | B10 x R209  | B10                                      | 61°C           | 1308U19              | 3402L20        |
| 2 <sup>nd</sup> | B10 x R209  | R209                                     | 59°C           | 1308U19b             | 3402L20b       |
| 2 <sup>nd</sup> | B10 x R209  | Noncrossover<br>B10→R209 at <i>BsrFI</i> | 63°C           | 2092U16R209          | 3402L20        |
| 2 <sup>nd</sup> | B10 x R209  | Noncrossover<br>R209→B10 at <i>BsrFI</i> | 63°C           | 2091U17B10           | 3402L20b       |
| 2 <sup>nd</sup> | B10 x R209  | Noncrossover<br>B10→R209 at <i>Styl</i>  | 62°C           | 2296U25A7H           | 3402L20        |
| 2 <sup>nd</sup> | B10 x R209  | Noncrossover<br>R209→B10 at <i>Styl</i>  | 62°C           | 2296U25S7H           | 3402L20b       |
| 2 <sup>nd</sup> | B10 x R209  | Noncrossover<br>B10→R209 at <i>SphI</i>  | 64°C           | SphU17A              | 3402L20        |
| 2 <sup>nd</sup> | B10 x R209  | Noncrossover<br>R209→B10 at <i>SphI</i>  | 64°C           | SphU17S              | 3402L20b       |
| 1 <sup>st</sup> | B10.A x SGR | All                                      | 60°C           | 881U21               | 10225L21       |
| 2 <sup>nd</sup> | B10.A x SGR | All                                      | 62°C           | 1297U20A<br>1296U21S | 1820L21        |
| 2 <sup>nd</sup> | B10.A x SGR | B10.A                                    | 60°C           | 1297U20A             | 3402L20b       |
| 2 <sup>nd</sup> | B10.A x SGR | SGR                                      | 60°C           | 1296U21S             | 3402L20        |
| 2 <sup>nd</sup> | B10.A x SGR | Crossover B10.A-<br>SGR                  | 63°C           | 1297U20A             | 3402L20        |
| 2 <sup>nd</sup> | B10.A x SGR | Crossover SGR-<br>B10.A                  | 63°C           | 1296U21S             | 3402L20b       |
| 2 <sup>nd</sup> | B10.A x SGR | Noncrossover<br>B10.A→SGR at -87         | 63°C           | 1297U20A             | 2020L17S       |
| 2 <sup>nd</sup> | B10.A x SGR | Noncrossover<br>SGR→B10.A at -87         | 63°C           | 1296U21S             | 2020L17A       |

|                 |             |                                              |      |             |            |
|-----------------|-------------|----------------------------------------------|------|-------------|------------|
| 2 <sup>nd</sup> | B10.A x SGR | Noncrossover<br>B10.A→SGR at<br><i>BsrFI</i> | 63°C | 2092U16R209 | 3402L20b   |
| 2 <sup>nd</sup> | B10.A x SGR | Noncrossover<br>SGR→B10.A at<br><i>BsrFI</i> | 63°C | 2091U17B10  | 3402L20    |
| 2 <sup>nd</sup> | B10.A x SGR | Noncrossover<br>B10.A→SGR at 38              | 63°C | 2128U28S    | 3402L20b   |
| 2 <sup>nd</sup> | B10.A x SGR | Noncrossover<br>SGR→B10.A at 38              | 63°C | 2128U28A    | 3402L20    |
| 2 <sup>nd</sup> | B10.A x SGR | Noncrossover<br>B10.A→SGR at 70              | 62°C | 2161U17SGR  | 3402L20b   |
| 2 <sup>nd</sup> | B10.A x SGR | Noncrossover<br>SGR→B10.A at 70              | 62°C | 2160U18B10  | 3402L20    |
| 2 <sup>nd</sup> | B10.A x SGR | Noncrossover<br>B10.A→SGR at 87              | 55°C | 2176U17SGR  | 3044L14B10 |
| 2 <sup>nd</sup> | B10.A x SGR | Noncrossover<br>SGR→B10.A at 87              | 55°C | 2176U17B10  | 3044L14SGR |
| 2 <sup>nd</sup> | B10.A x SGR | Noncrossover<br>B10.A→SGR at <i>Styl</i>     | 62°C | 2296U25S7H  | 3402L20b   |
| 2 <sup>nd</sup> | B10.A x SGR | Noncrossover<br>SGR→B10.A at <i>Styl</i>     | 62°C | 2296U25A7H  | 3402L20    |
| 2 <sup>nd</sup> | B10.A x SGR | Noncrossover<br>B10.A→SGR at<br><i>SphI</i>  | 64°C | SphU17S     | 3402L20b   |
| 2 <sup>nd</sup> | B10.A x SGR | Noncrossover<br>SGR→B10.A at<br><i>SphI</i>  | 64°C | SphU17A     | 3402L20    |

**c. A3 hotspot primer sequences.**

| A3 primers | Sequence                  | Strain specificity |
|------------|---------------------------|--------------------|
| A3f600     | TGAAGCTCACTATTCTGTGCAA    | Universal          |
| A3f943     | GAAATCTCCCAGAGCACAGG      | Universal          |
| A3r3588    | AATGTGACAGGAGAGGAGCTGACCA | Universal          |
| A3r3938    | ATGTGGAGAGGCCAGCGCTCA     | Universal          |
| A3r6000    | GAGACACAATTCAGGTCCTGA     | Universal          |
| Bf3        | ATAAGCACGTATTTGAGGCC      | A/J                |
| Df3-1      | AAGCACGTGTTTGAGGCC        | DBA/2J             |
| Bf4-1      | CAGCAGCTGAGTTAAACT        | A/J                |
| Df4-1      | CAGCAGCTGAGTTAAACA        | DBA/2J             |
| Dr5465     | GTGTCACATTTTCAGTTGATGC    | DBA/2J             |
| Br4020     | TCTCCAACAGTGGGGGAT        | A/J                |
| Dr4020     | TCTCCAACAGTGGGGGAC        | DBA/2J             |
| Br3938     | GCTACCTTCTAAAAGTGGA       | A/J                |

**d. A3 primer combinations.**

| PCR             | Specificity        | Annealing Temperature | Forward primer | Reverse primer |
|-----------------|--------------------|-----------------------|----------------|----------------|
| 1 <sup>st</sup> | Universal          | 60°C → 58°C           | A3f600         | A3r6000        |
| 2 <sup>nd</sup> | A/J → DBA/2J       | 64°C → 63°C → 62°C    | Bf3            | Dr5465         |
| 2 <sup>nd</sup> | DBA/2J → A/J       | 64°C → 63°C → 62°C    | Df3-1          | Br4020         |
| 3 <sup>rd</sup> | A/J → DBA/2J       | 62°C                  | Bf4-1          | Dr4020         |
| 3 <sup>rd</sup> | DBA/2J → A/J       | 62°C                  | Df4-1          | Br3938         |
| 2 <sup>nd</sup> | A/J → Universal    | 64°C → 63°C → 62°C    | Bf3            | A3r3938        |
| 2 <sup>nd</sup> | DBA/2J → Universal | 64°C → 63°C → 62°C    | Df3-1          | A3r3938        |
| 3 <sup>rd</sup> | A/J → Universal    | 62°C                  | Bf4-1          | A3r3588        |
| 3 <sup>rd</sup> | DBA/2J → Universal | 62°C                  | Df4-1          | A3r3588        |
| 4 <sup>th</sup> | Universal          | 61°C → 59°C           | A3f943         | A3r3588        |

**e. A3 oligo sequences for genotyping.**

| Allele Build 37 | A/J oligo           | DBA/2J oligo        |
|-----------------|---------------------|---------------------|
| 1:161954686     | AGCACCATGGAGCGGCTG  | AGCACCACGGAGCGGCTG  |
| 1:161955037     | TGCATGTAAGTAAAGGGC  | TGCATGTGGTAAAGGGC   |
| 1:161955139*    | GTCTCCACGCCTCAGCAT  | CTCTCCATGCCTCAGCAT  |
| 1:161955306     | AATAATGATCCAGTCTTT  | AATAATGGTCCAGTCTTT  |
| 1:161955342     | TTCTTCTTTGTGAATTTT  | TTGTTCTCTGTGAATTTT  |
| 1:161955432     | ATGCATCACGTGCATCTC  | ATGCATCCCGTGCATCTC  |
| 1:161955480     | TTGCCATCCCAGGGACT   | TTGCCATCCCTAGGGACT  |
| 1:161955488     | CAGGGACTACACGGTTAT  | TAGGGACTGCACGGTTAT  |
| 1:161955604     | ATAAAGCCTGGGGCTATA  | ATAAAGC-TCAATCTTAGA |
| 1:161955784     | AGAGTCTCAAGCAATCCA  | AGAGTCTCAAACAATCCA  |
| 1:161955792     | CAATCCACACTGACCTTG  | CAATCCATACTGACCTTG  |
| 1:161955851**   | TCACAGACGTGCCCTGAC  | TCACAGATGTCCCTTAC   |
| 1:161955880*    | CCAGAAGCTGCTATCATG  | CCAGAAGCTGCTACCATG  |
| 1:161955885*    | CATGCGCCACACCCACAG  | CATGTTGCGCCACACCCAC |
| 1:161955887*    | ACACCCACAGCCACACCC  |                     |
| 1:161955968     | CATCGTTCCAATCCCCTA  | CATCGTTACAATCCCCTA  |
| 1:161956144     | TGTTGCTTCATGGGTTTG  | TGTTGCTGCATGGGTTTG  |
| 1:161956261     | CAGAAGTTTTTGAGTTCG  | CAGAAGCTTTTGAGTTCG  |
| 1:161956354     | GAGATGACTCTAGAATGT  | GAGATGAACTCTAGAATGT |
| 1:161956547     | ATGTGTATTTCCCTAATAC | ATGTGTAGTTCCCTAATAC |
| 1:161956666     | CTATGAGTAAAATTGAGT  | CTATGAGTGAAAATTGAGT |
| 1:161956882     | CACGGTCTTGTGGGCTT   | CACCGTTTTTGTGGGCTT  |

\*Probes new to this study. All other probes were identical to those used in the previous study<sup>18</sup>. \*\*The A/J oligo has a mismatch at the 3<sup>rd</sup> polymorphism with the A/J genomic sequence (TCACAGACGTGCCCTTAC).

**f. Southwestern: Primers used for generating probes across the A3 hotspot.**

| Probe | Primer     | Sequence                           | Strain   |
|-------|------------|------------------------------------|----------|
| 1     | Xb1524U20  | gct cta gaGGTGCAAGAACACAGTTTCA     | A/J, DBA |
|       | Xb1814L18  | gct cta gaGCTCGGTGCTGGAGGTAC       | A/J, DBA |
| 2     | Xb1752U19  | gct cta gAATAACAAGGGTTGGCAAG       | A/J, DBA |
|       | Xb2018L20  | gct cta gACACCCCTCTTCTGGACTCTT     | A/J, DBA |
| 3     | Xb1978U21  | gct cta gaTTGTGAGTCTATCAATGCATC    | A/J, DBA |
|       | Xb2246L21  | gct cta gaCAATTAACCTTTGCTGGTTTGT   | A/J, DBA |
| 4     | Xb2206U21  | gct cta gACCACCTAGTGTGCTAGTGTG     | A/J, DBA |
|       | Xb2408L17A | gct cta gaCATGGTAAGGGCACGTC        | A/J      |
|       | Xb2408L17D | gct cta gaCATGGTAAGGGGACATC        | DBA      |
| 5     | Xb2242U23  | gct cta gAACAACAAACCAGCAAAGTTAAT   | A/J, DBA |
|       | Xb2501L20  | gct cta gaGTCTAGGACAAGGCATGAGA     | A/J, DBA |
| 6     | Xb2465U16  | gct cta gaCACAGGAAGCCGATCA         | A/J, DBA |
|       | Xb2741L20  | gct cta gAATGCCAGATGGTATCCCTA      | A/J, DBA |
| 7     | Nh2687U16  | aat tcg cta GCCATCCCCTGTTGCT       | A/J, DBA |
|       | Nh2937L21  | aat tcg cta GCTGGAATGGAAAGAACTCAT  | A/J, DBA |
| 8     | Nh2919U19  | aat tcg cta gcAATGTTCTTCCGGGTCTCA  | A/J, DBA |
|       | Nh3180L21  | aat tcg cta gCAGTGACACCAGGACTCAAAC | A/J, DBA |

**g. Southwestern: Oligos annealed to generate probes at the A3 PRDM9 binding site.**

| Oligo | Sequence                                                | Strain |
|-------|---------------------------------------------------------|--------|
| A3_AU | CGTGCCCTTACCATGTCCAGAAGCTGCTATCATGCGCCACACCCACAGCCACAC  | A/J    |
| A3_AL | TGGGTGTGGCTGTGGGTGTGGCGCATGATAGCAGCTTCTGGACATGGTAAGGGC  | A/J    |
| A3_BU | CGTGCCCTGACCATGTCCAGAAGCTGCTACCATGCGCCACACCCACAGCCACAC  | B6     |
| A3_BL | TGGGTGTGGCTGTGGGTGTGGCGCATGGTAGCAGCTTCTGGACATGGTCAGGGC  | B6     |
| A3_DU | TGTCCCCTTACCATGTCCAGAAGCTGCTACCATGTTGCGCCACACCCACAGGAAG | DBA    |
| A3_DL | CGGCTTCTGTGGGTGTGGCGAACATGGTAGCAGCTTCTGGACATGGTAAGGGG   | DBA    |

**Supplementary Table 3: Probability of detecting a crossover or a noncrossover in single oocytes.**

| Exp. | Hybrid      | $n_{\text{tot}}$ | $n_0$ | $n_1$ | $n_2$ | $n_2/n_1$ | $p$   | $P_{1\text{CO}}$ | $P_{2\text{CO}}$ | $n_0$ expected |
|------|-------------|------------------|-------|-------|-------|-----------|-------|------------------|------------------|----------------|
| 1    | B10 x R209  | 48               | 2     | 9     | 37    | 4.111     | 0.671 | 0.892            | 0.450            | 1              |
| 2    | B10 x R209  | 48               | 5     | 6     | 37    | 6.167     | 0.726 | 0.925            | 0.527            | 0              |
| 3    | B10 x R209  | 32               | 2     | 7     | 23    | 3.286     | 0.637 | 0.868            | 0.406            | 1              |
| 4    | B10.A x SGR | 51               | 3     | 10    | 38    | 3.500     | 0.646 | 0.875            | 0.478            | 1              |
| 5    | B10.A x SGR | 90               | 0     | 19    | 71    | 3.737     | 0.656 | 0.882            | 0.431            | 1              |
| 6    | B10.A x SGR | 69               | 2     | 8     | 59    | 7.375     | 0.748 | 0.937            | 0.560            | 0              |

Exp., experiment number.

$n_{\text{tot}}$ , total number of oocytes tested.

$n_0$ ,  $n_1$ ,  $n_2$ , number of oocytes with observed amplification of zero, one, and both parental alleles.

$p$ , probability of amplifying a specific chromatid based on a  $B(4,p)$  distribution, which is equivalent to the probability of detecting a noncrossover involving a single chromatid.

$P_{1\text{CO}}$ , probability of amplifying at least one of chromatid from a crossover.

$P_{2\text{CO}}$ , probability of amplifying both chromatids from a crossover.

$n_0$  expected, estimate of expected  $n_0$  based on the value of  $p$ . The excess of oocytes with no observed amplification (i.e.,  $n_0$ ) is likely due to a lack of amplifiable DNA, such that these oocytes were not further considered in frequency calculations. For each individual experiment, oocytes were collected from one single 25 to 30-day-old mouse.
